# Supplementary material for: Polymer monolith containing an embedded covalent organic framework for the effective enrichment of benzophenones
Source: Royal Society of Chemistry journal article supplement (doi:10.1039/c7nj02512b), 2017-01-01
Supplement: c7nj02512b1.pdf [file c7nj02512b1.pdf]

## Electronic Supplementary Material

Polymer monolith containing embedded covalent organic framework for effective enrichment of benzophenones

*Huiqi Wang<sup>a</sup>, Zheng Li<sup>a</sup>, Wei Feng<sup>b,\*</sup>, Qiong Jia<sup>a,\*</sup>*

*<sup>a</sup> College of Chemistry, Jilin University, Changchun 130012, China*

*<sup>b</sup> The First Hospital of Jilin University, Changchun 130021, China*

\*Corresponding authors. E-mail addresses: doctorfengwei@126.com (W. Feng),  
jiaqiong@jlu.edu.cn (Q. Jia)

### CONTENTS

**Figures S1-S5**

**Tables S1-S3**

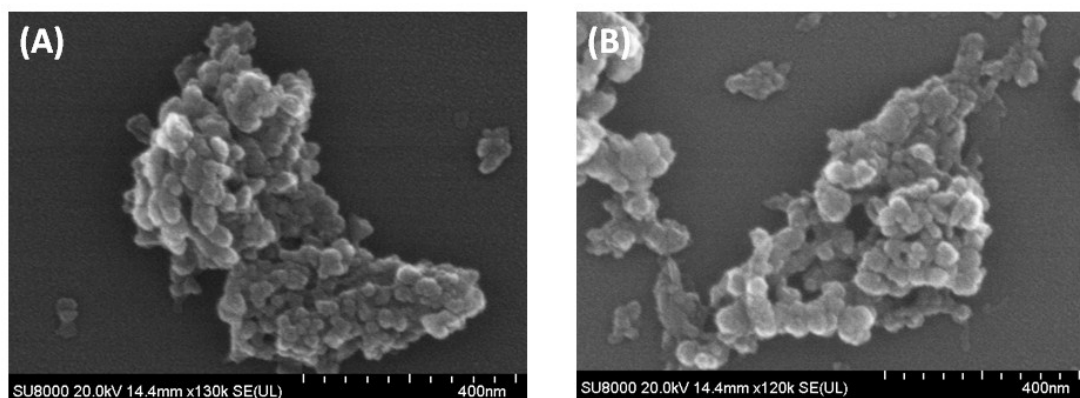

**Figure S1** SEM images of (A) COF-COOH and (B) COF-SH

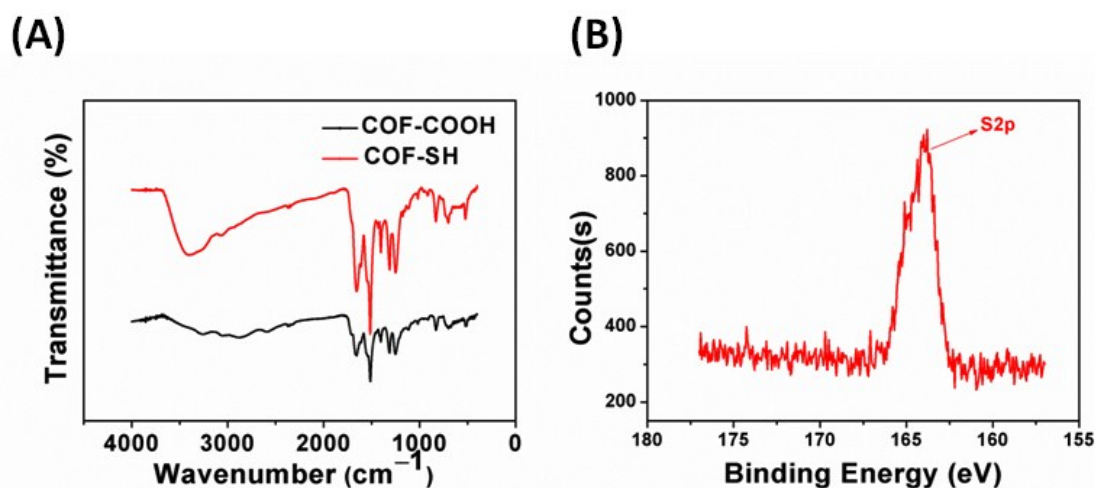

**Figure S2** (A) IR spectra of COF-COOH and COF-SH. (B) XPS spectrum for S element of COF-SH

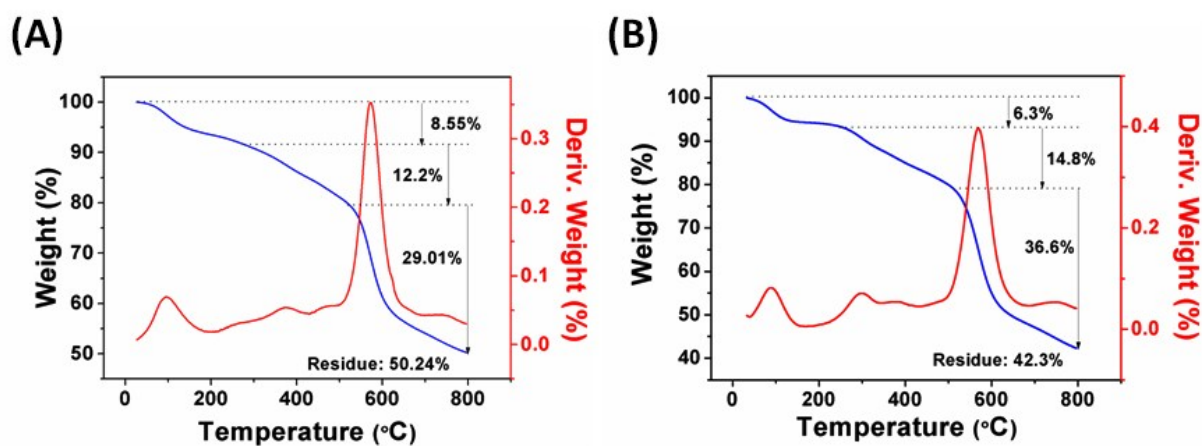

**Figure S3** Thermal analyses of (A) COF-COOH and (B) COF-SH

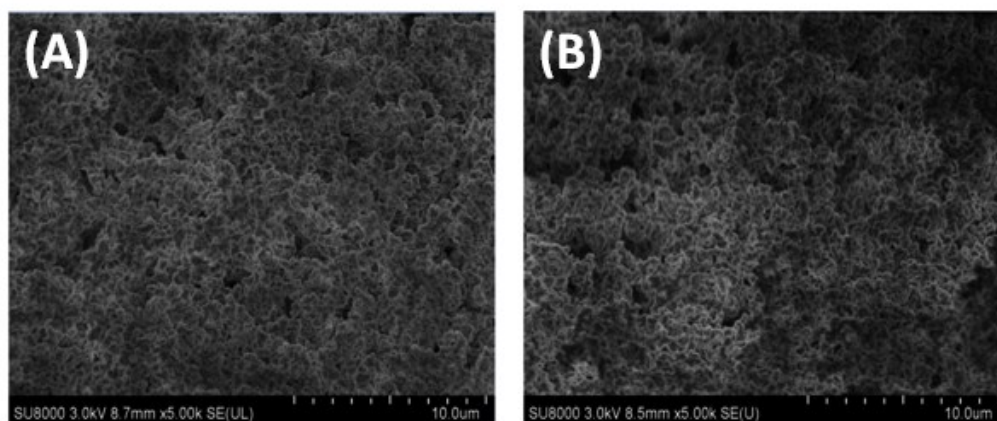

**Figure S4** SEM images of COF@poly(GMA-EDMA) monolith (A) before and (B) after extraction

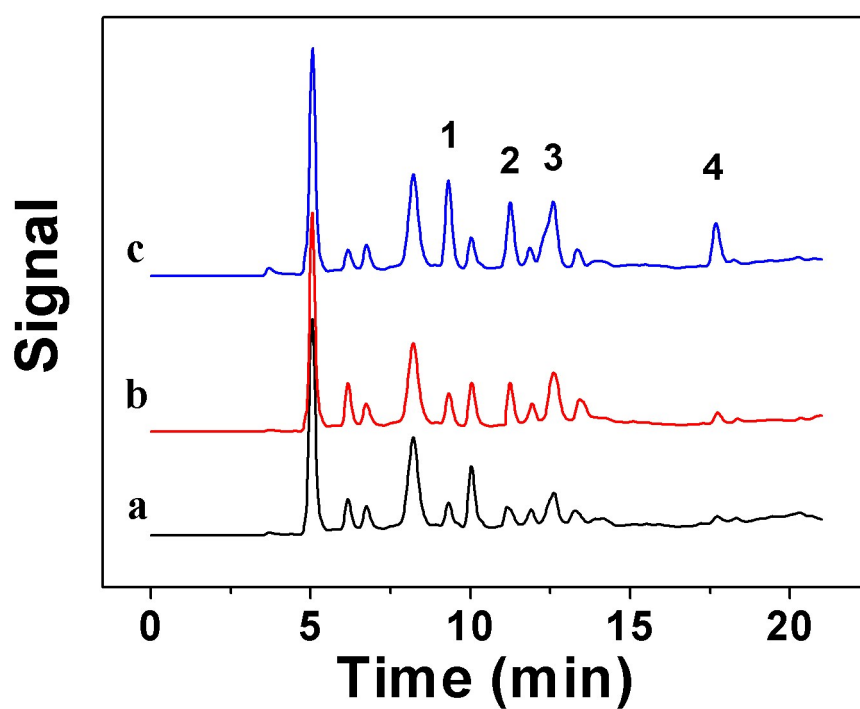

**Figure S5** Chromatograms of BPs in serum samples obtained by PMME procedures: (a) unspiked sample; (b) sample spiked with Level 1; (c) sample spiked with Level 2; peaks: (1) DHBP, (2) HBP, (3) DHMBP, and (4) HMBP

**Table S1** Permeability and SP values of different monoliths

| Column | Monomers (% w/w) |      | Porogen (% w/w) |           | Permeability ( $\times 10^{-9} \text{ cm}^2$ ) <sup>a</sup> | SP   |
|--------|------------------|------|-----------------|-----------|-------------------------------------------------------------|------|
|        | GMA              | EDMA | Cyclohexanol    | Dodecanol |                                                             |      |
| C-1    | 24               | 16   | 54              | 6         | 5.13                                                        | 0.44 |
| C-2    | 21               | 14   | 58.5            | 6.5       | 5.69                                                        | 0.42 |
| C-3    | 18               | 12   | 63              | 7         | 6.42                                                        | 0.39 |

<sup>a</sup> The permeability of the monolithic columns was determined with MeOH as the mobile phase at  $0.3 \text{ mL min}^{-1}$

**Table S2** Comparison of various methods for the determination of the BPs.

| Analysts          |       |       | Samples                       | Pretreatment methods | Analytical techniques | LOD (ng mL <sup>-1</sup> ) | EF                     | Ref.      |
|-------------------|-------|-------|-------------------------------|----------------------|-----------------------|----------------------------|------------------------|-----------|
| HBP,              | DHBP, | HMBP, | Human serum samples           | DLLME                | UPLC-MS/MS            | 0.1-0.2                    | –                      | 1         |
| DHMBP             |       |       |                               |                      |                       |                            |                        |           |
| HBP, DHBP, HMBP   |       |       | Sunscreen samples             | DLLME                | CE                    | 3.9-6.7                    | 32.0-40.5 <sup>a</sup> | 5         |
| HBP, DHBP, HMBP   |       |       | Water samples                 | DLLME                | HPLC                  | 2.4-6.4                    | 18.9-21.7              | 7         |
| HBP, DHBP, HMBP   |       |       | Water samples                 | Magnetic PMME        | HPLC                  | 0.4-0.8                    | –                      | 8         |
| HBP,              | DHBP, | HMBP, | Human menstrual blood samples | DLLME                | UHPLC-MS/MS           | 0.1-0.3                    | –                      | 9         |
| DHMBP             |       |       |                               |                      |                       |                            |                        |           |
| HBP,              | DHBP, | HMBP, | Water samples                 | Dispersive SPME      | HPLC-MS/MS            | 0.16-1.21                  | 17.3-49.2              | 12        |
| DHMBP             |       |       |                               |                      |                       |                            |                        |           |
| DHBP, HMBP, DHMBP |       |       | Human serum samples           | DLLME                | HPLC-MS/MS            | 7-8                        | 3.1-7.4 <sup>b</sup>   | 48        |
| DHBP, HMBP        |       |       | Toner samples                 | DSPE                 | HPLC                  | 0.9-1.2                    | –                      | 50        |
| HBP,              | DHBP, | HMBP, | Human urine and serum samples | PMME                 | HPLC                  | 0.4–0.7                    | 17.5-40.3              | This work |
| DHMBP             |       |       |                               |                      |                       |                            |                        |           |

<sup>a</sup> EF was defined as the ratio between the analyte concentration in the final diluted phase ( $C_f$ ) and the initial concentration of analyte ( $C_0$ ) within the sample.

<sup>b</sup> EF was defined as the ratio between the analyte concentration in the organic sedimented phase ( $C_{sed}$ ) and the initial concentration of this compound in the aqueous phase ( $C_0$ ).

**Table S3** Recoveries (%) of the four BPs in real samples ( $n = 3$ )

| Sample         |                                 |         | DHBP        | HBP        | DHMBP       | HMBP        |
|----------------|---------------------------------|---------|-------------|------------|-------------|-------------|
| Urine sample 1 | Measured (ng mL <sup>-1</sup> ) |         | < LOD       | < LOD      | 23.9        | < LOD       |
|                | Recovery ± RSD (%)              | Level 1 | 81.2 ± 5.4  | 79.5 ± 2.0 | 86.5 ± 2.3  | 100.8 ± 5.1 |
|                |                                 | Level 2 | 82.7 ± 6.0  | 94.5 ± 4.9 | 104.5 ± 5.6 | 93.3 ± 6.7  |
| Urine sample 2 | Measured (ng mL <sup>-1</sup> ) |         | 14.5        | < LOD      | 23.3        | < LOD       |
|                | Recovery ± RSD (%)              | Level 1 | 101.6 ± 3.2 | 82.7 ± 3.1 | 95.5 ± 2.0  | 88.1 ± 6.9  |
|                |                                 | Level 2 | 98.0 ± 5.7  | 93.9 ± 5.5 | 82.7 ± 2.6  | 95.6 ± 0.7  |
| Urine sample 3 | Measured (ng mL <sup>-1</sup> ) |         | 6.4         | < LOD      | 36.6        | < LOD       |
|                | Recovery ± RSD (%)              | Level 1 | 91.4 ± 6.7  | 93.5 ± 1.5 | 83.5 ± 5.4  | 85.5 ± 5.1  |
|                |                                 | Level 2 | 87.4 ± 5.6  | 92.2 ± 4.1 | 91.9 ± 5.2  | 103.7 ± 3.6 |
| Serum sample 1 | Measured (ng mL <sup>-1</sup> ) |         | 22.6        | 15.6       | 16.4        | 6.2         |
|                | Recovery ± RSD (%)              | Level 1 | 97.4 ± 5.6  | 89.1 ± 3.1 | 88.2 ± 4.4  | 99.4 ± 5.1  |
|                |                                 | Level 2 | 102.0 ± 7.4 | 99.0 ± 0.9 | 97.7 ± 5.4  | 89.0 ± 6.7  |
| Serum sample 2 | Measured (ng mL <sup>-1</sup> ) |         | < LOD       | 34.9       | 105.1       | < LOD       |
|                | Recovery ± RSD (%)              | Level 1 | 87.9 ± 6.5  | 96.4 ± 7.5 | 97.4 ± 2.3  | 85.4 ± 6.1  |

|                |                                 |         |            |            |             |             |
|----------------|---------------------------------|---------|------------|------------|-------------|-------------|
| Serum sample 3 | Measured (ng mL <sup>-1</sup> ) | Level 2 | 99.4 ± 5.2 | 96.8 ± 7.7 | 97.2 ± 7.0  | 105.0 ± 8.2 |
|                |                                 |         | < LOD      | 22.3       | 25.6        | 14.3        |
|                | Recovery ± RSD (%)              | Level 1 | 97.9 ± 3.5 | 98.4 ± 3.5 | 107.7 ± 1.3 | 95.4 ± 2.5  |
|                |                                 | Level 2 | 79.8 ± 5.9 | 86.8 ± 0.7 | 92.0 ± 7.2  | 105.7 ± 5.0 |
